# Supplementary material for: Prediction and treatment of skin adverse reactions related to inhibitors at immune checkpoints
Source: Research Square preprint supplement (doi:10.21203/rs.3.rs-7640849/v1), 2025-10-18
Supplement: Supplementary file 1 [file 70d4fe20bfa18d56106c811a.docx]

| 指标 | 训练集 | 验证集 | 统计检验 |
| --- | --- | --- | --- |
| AUC (95%CI) | 0.869（0.693-1.000） | 0.848（0.657-1.000） | DeLong test p=0.15 |
| Sensitivity (%) | 86.7 | 83.3 |  |
| Specificity (%) | 87.5 | 85.0 |  |
| Level III/IV recognition rate | Accuracy 93.6% (44/47) | Sensitivity 85.7% (6/7) | F1-score=0.82 |

表2 模型性能核心指标
